# Supplementary material for: Enzymatic Hydrolysis of Poly(3-Hydroxybutyrate-co-3-Hydroxyvalerate) Scaffolds
Source: PubMed Central journal article supplement (PMC7372466; doi:10.3390/ma13132992), 2020-07-05
Supplement: materials-13-02992-s001.pdf [file materials-13-02992-s001.pdf]

Supplementary Materials

# Enzymatic Hydrolysis of Poly(3-Hydroxybutyrate-co-3-Hydroxyvalerate) Scaffolds

Adriana Kovalcik <sup>1,\*</sup>, Stanislav Obruca <sup>1</sup>, Michal Kalina <sup>2</sup>, Michal Machovsky <sup>3</sup>, Vojtech Enev <sup>2</sup>, Michaela Jakesova <sup>1</sup>, Marketa Sobkova <sup>1</sup> and Ivana Marova <sup>1</sup>

<sup>1</sup> Department of Food Chemistry and Biotechnology, Faculty of Chemistry, Brno University of Technology, Purkynova 118, 612 00 Brno, Czech Republic; obruca@fch.vut.cz (S.O.); xcjakesova@vutbr.cz (M.J.); xcsobkovama@vutbr.cz (M.S.); marova@fch.vut.cz (I.M.)

<sup>2</sup> Department of Physical and Applied Chemistry, Faculty of Chemistry, Brno University of Technology, Purkynova 118, 612 00 Brno, Czech Republic; kalina-m@fch.vut.cz (M.K.); enev@fch.vut.cz (V.E.)

<sup>3</sup> Centre of Polymer Systems, Tomas Bata University in Zlin, trida Tomase Bati 5678, 760 01 Zlin, Czech Republic; machovsky@utb.cz

\* Correspondence: kovalcik@fch.vut.cz; Tel.: +420-541-149-422

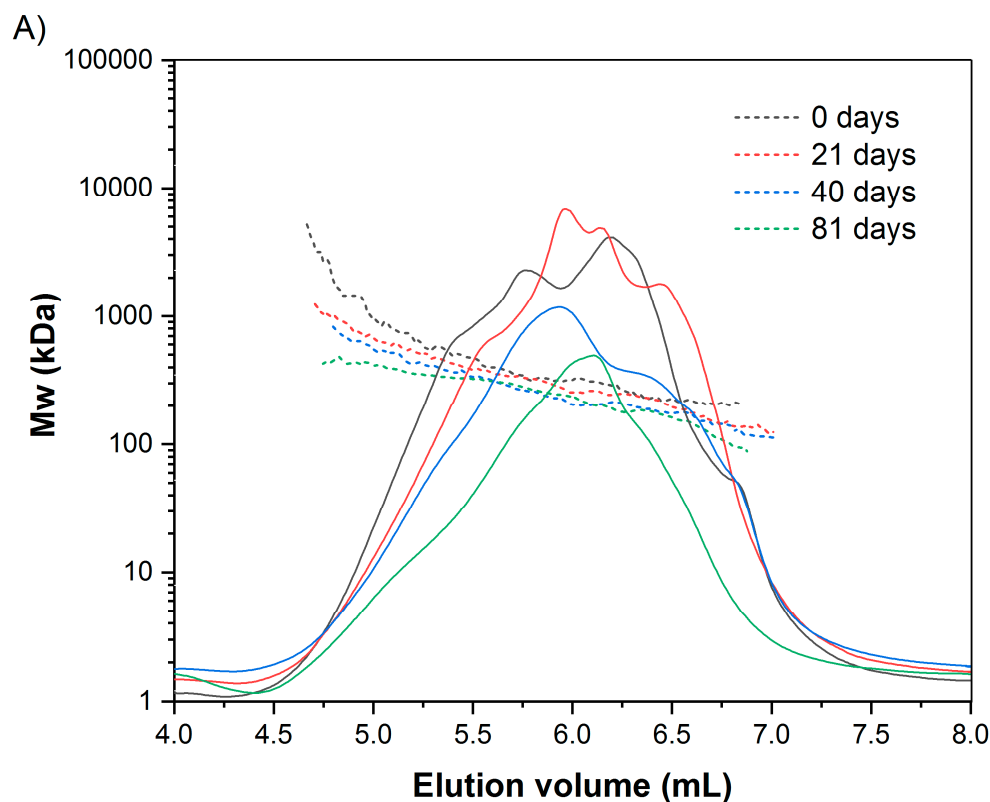

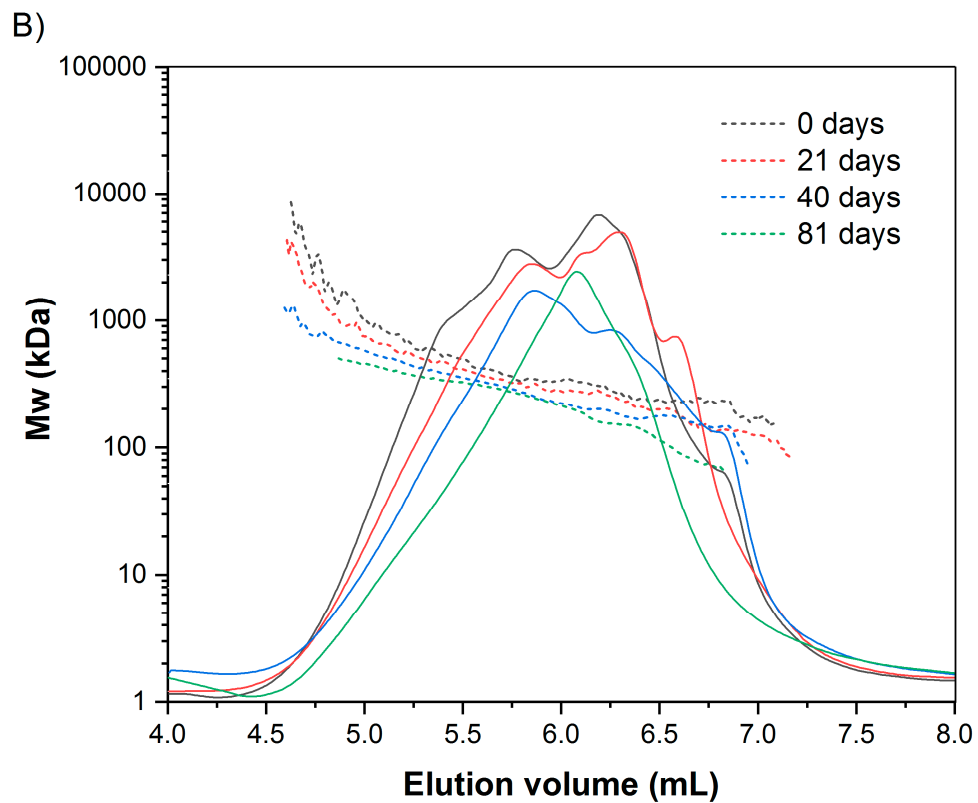

Figure S1. SEC-MALLS chromatograms obtained for PHB degradation in (A) PBS with lipase, (B) SGJ.

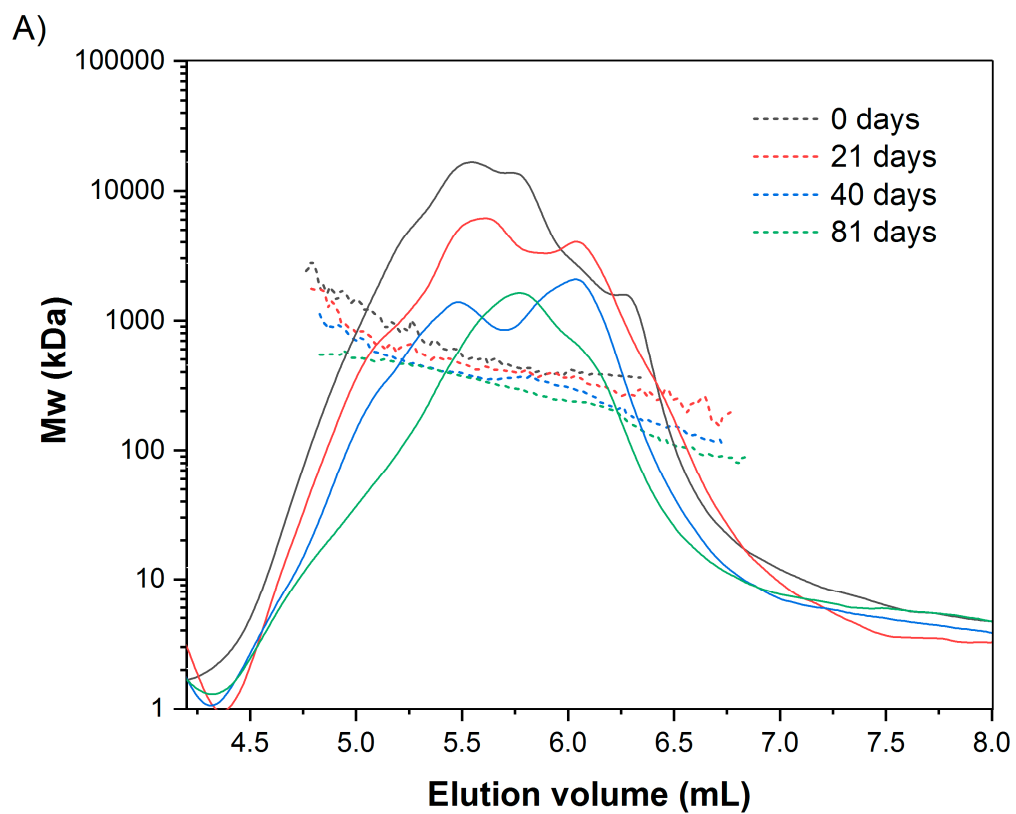

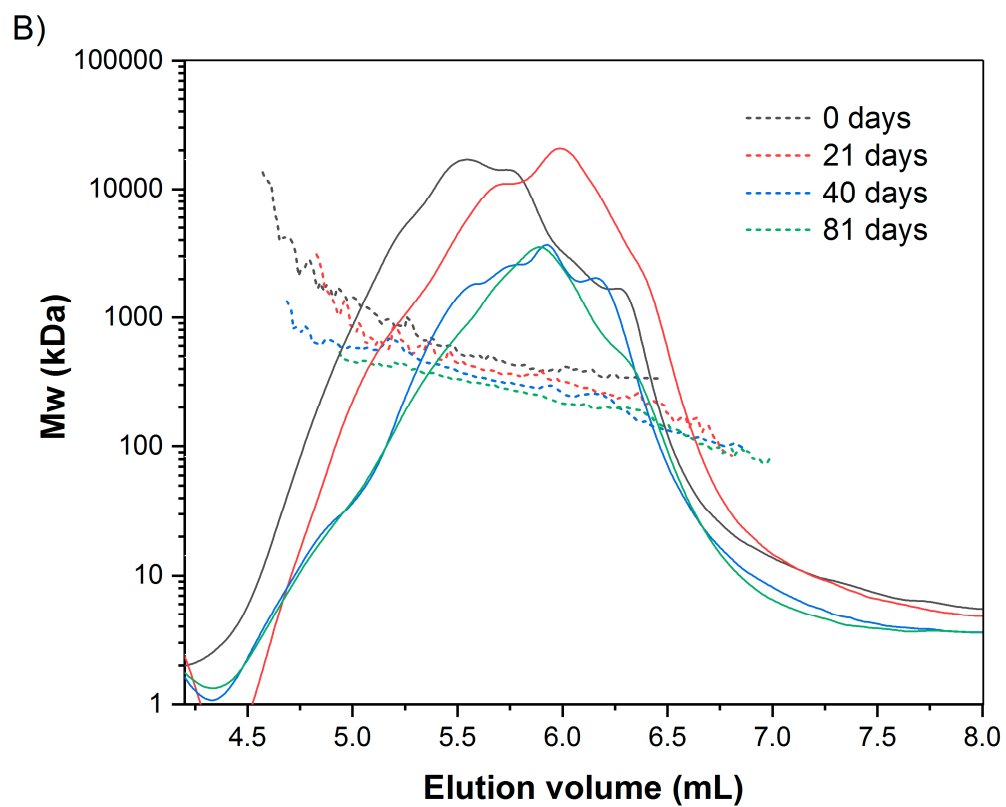

Figure S2. SEC-MALLS chromatograms obtained for PHBV-1 degradation in (A) PBS with lipase, (B) SGJ.

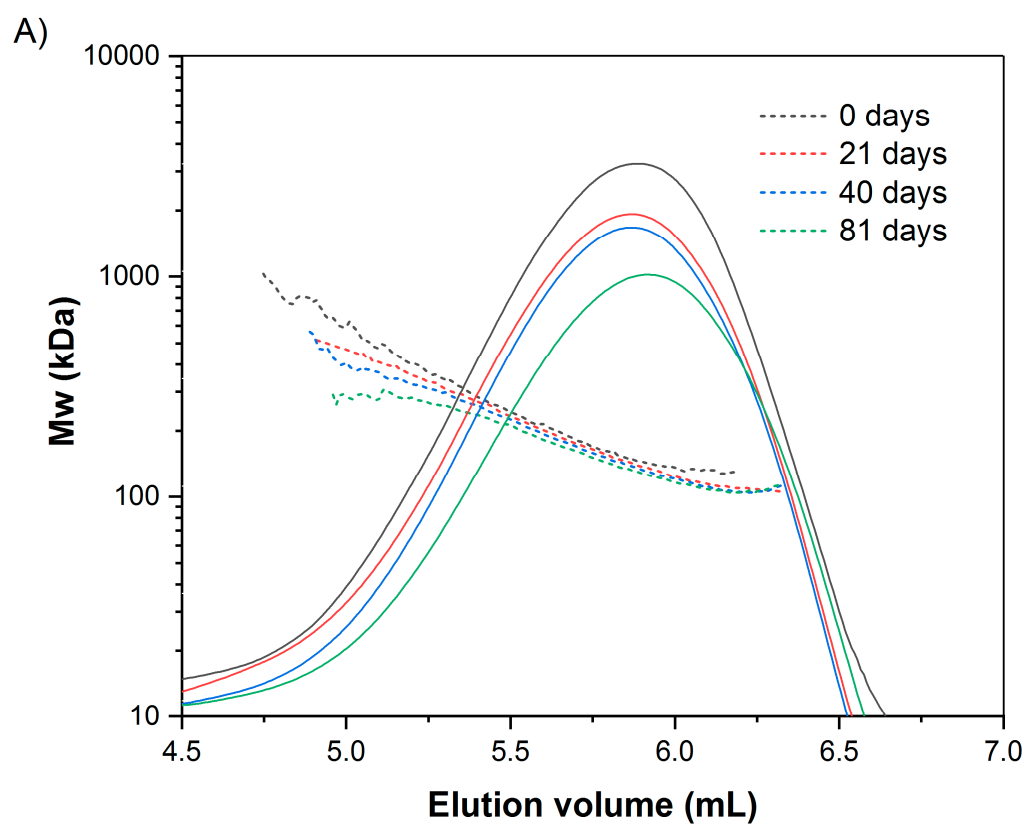

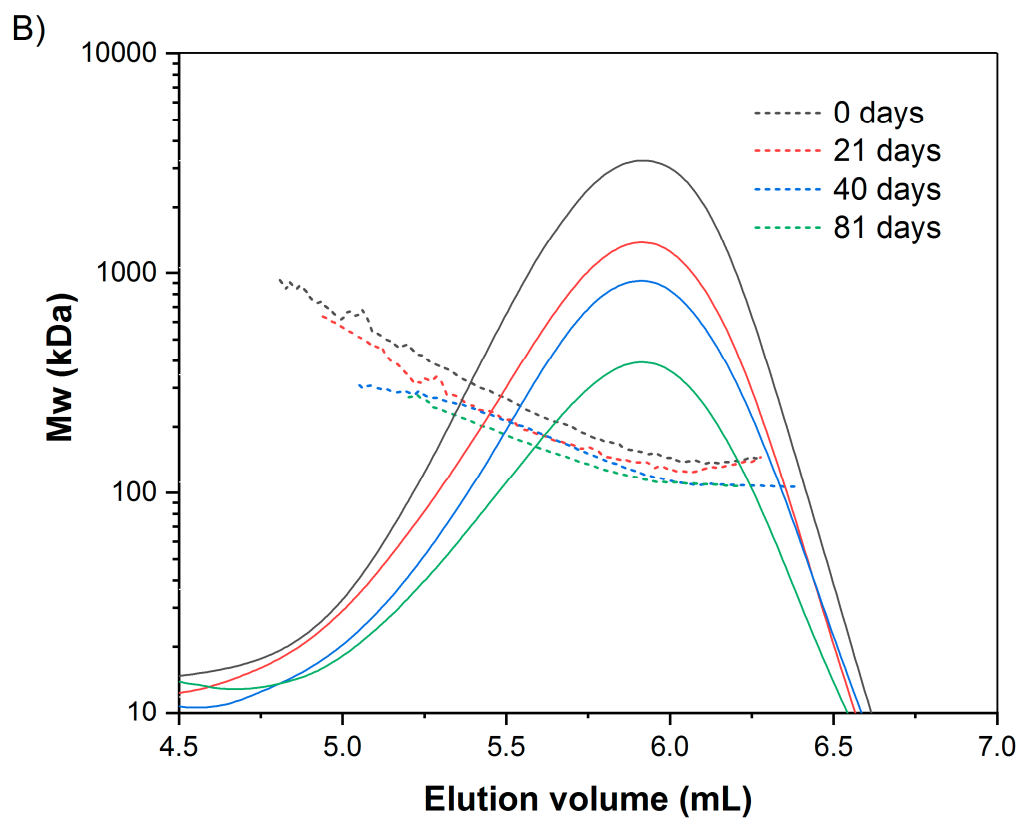

**Figure S3.** SEC-MALLS chromatograms obtained for PHBV-2 degradation in (A) PBS with lipase, (B) SGJ.

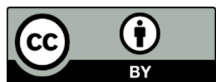

© 2020 by the authors. Submitted for possible open access publication under the terms and conditions of the Creative Commons Attribution (CC BY) license (<http://creativecommons.org/licenses/by/4.0/>).
